# Supplementary material for: Synthesis and luminescence properties of mesostructured thin films activated by in-situ formed trivalent rare earth ion complexes
Source: Royal Society of Chemistry journal article supplement (doi:10.1039/b206433b), 2002-01-01
Supplement: b206433b.doc [file b206433b.doc]

Electronic Supplementary Information

In order to demonstrate that the organic RE-phen complexes are formed *in-situ* in the organic P123 triblock-copolymer regions of the mesostructured composite films we prepared also films of pure P123 with incorporated rare earth ions and phen ligands. These films were synthesized by dissolving appropriate amounts of RE-chlorides-hexahydrates and 1,10-phenanthroline (molar ratio RE:phen of 1:3) in a solution of 1.37 g Pluronic P123 surfactant in 15 g EtOH. From this precursor solution thin films were obtained by dip-coating on cleaned glass slides. The RE-phen complex concentration was varied between 2 and 6 wt% with respect to the amount of P123 surfactant.

The same photoluminescence (PL) set-up (351 nm output of an Argon ion laser) was used as described in the main text of the paper. Two points of the PL emission results obtained from these films should be emphasized: Firstly, the blue emission band between 400 and 500 nm, which was observed when the rare earth ions and phen ligands were incorporated into the pure silica matrix, was absent for all P123 samples. Secondly, the rare earth ion PL emission bands appeared at the same position and with the same shape as in the P123/silica mesostructured film samples. As an example, in Fig. ESI-1 is given the PL emission spectrum of a P123 film doped with 2 wt% of *in-situ* formed Eu3+-phen complex. The strongest peak, which is centered at 614 nm and assigned to the 5D07F2 transition, shows the same three-fold splitting with very similar relative intensities of the three crystal field components. This result is of particular importance since this transition is a co-called hypersensitive transition of the Eu3+ ion and is known to be sensitive to its crystal field environment. These two observations – the absence of a blue emission band as observed in a pure silica glass matrix as well as the position, shape, and relative intensities of the crystal field components of the hypersensitive Eu3+ ion 5D07F2 transition – are a strong evidence that the RE-phen complexes are in-situ formed in the organic P123 nano-domains of the mesostructured thin films.

However, it should be mentioned that all of the pure P123 films suffered severe photo-degradation under laser light illumination and after only a few seconds of excitation at 351 nm the PL emission intensity decreases drastically.


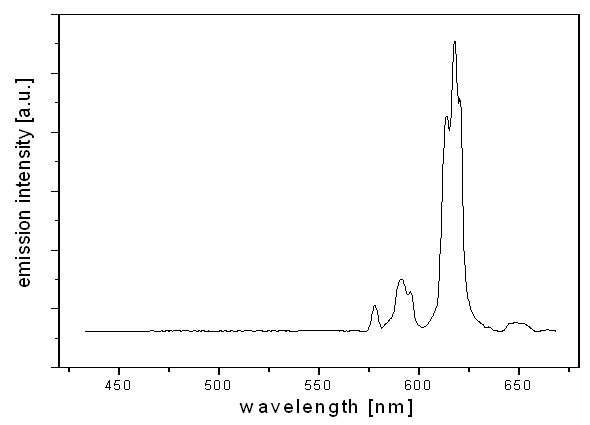


# Fig. ESI-1

PL emission spectrum of a Eu3+-phen doped (2 wt%) Pluronic P123 film after excitation at 351 nm.
